# Supplementary material for: Enhanced fluorescent intensity of graphene oxide–methyl cellulose hybrid in acidic medium: Sensing of nitro-aromatics
Source: Royal Society of Chemistry journal article supplement (doi:10.1039/c2jm30402c), 2012-01-01
Supplement: c2jm30402c.pdf [file c2jm30402c.pdf]

## Supporting Information

### **Enhanced Fluorescent Intensity of Graphene Oxide - Methyl Cellulose Hybrid in Acidic Medium : Sensing of Nitro-aromatics**

Aniruddha Kundu, Rama K. Layek and Arun K. Nandi\*

Polymer Science Unit, Indian Association for the Cultivation of Science,

Jadavpur, Kolkata--700 032, India

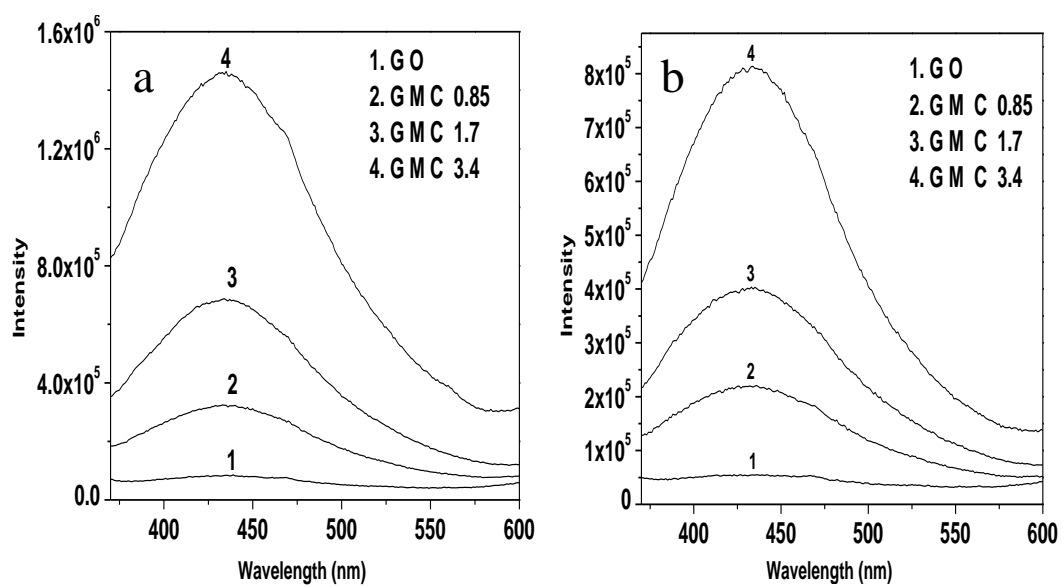

**Fig S1.** PL spectra of pure GO and GMC at different concentration (a)  
at pH 7 (b) at 9.2

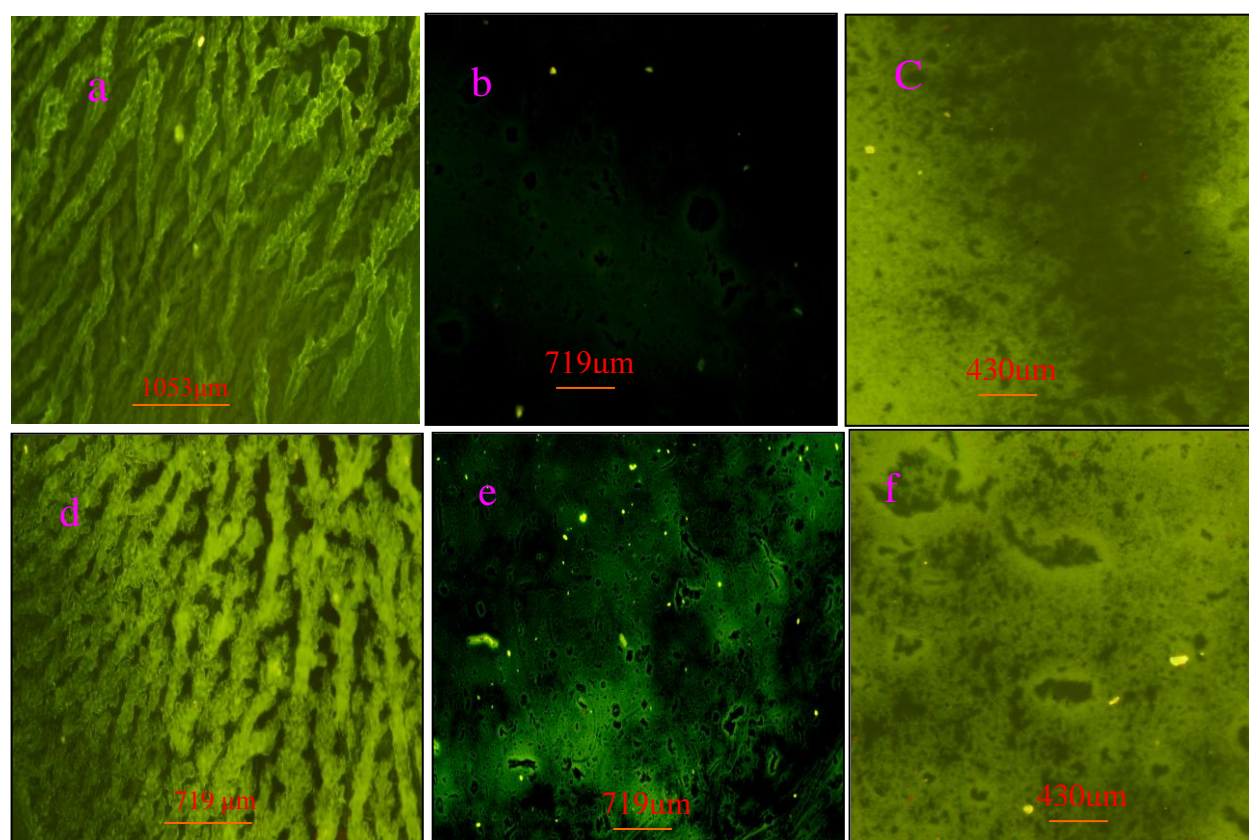

**Fig S2.** Fluorescence micrographs of GMC 1.7 (a, b, c) and GMC 3.4 (d, e, f) at pH 4, pH 7 and pH 9.2, respectively.

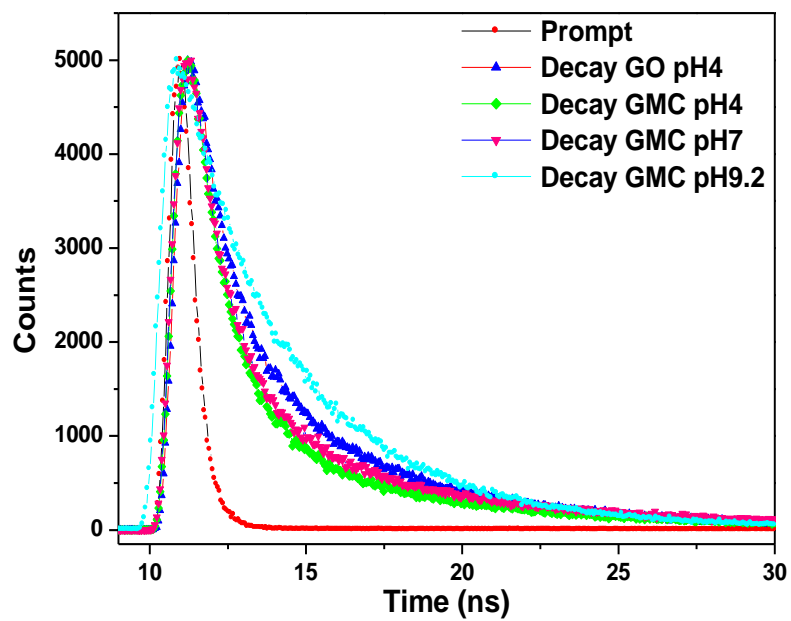

**Fig S3.** Time –resolved PL of GO (at pH4) and GMC3.4 at different pH.

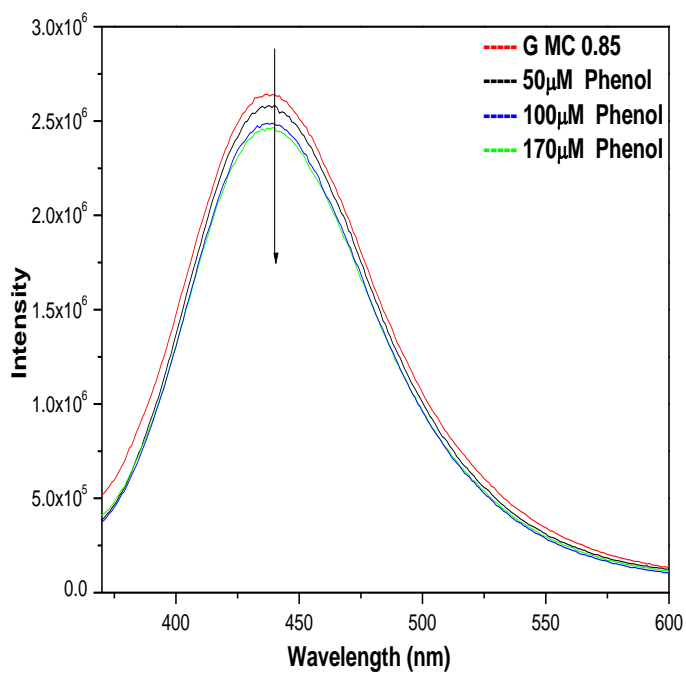

**Fig S4.** Fluorescence titration of GMC solution at pH=4  
with different micro molar phenol solution.

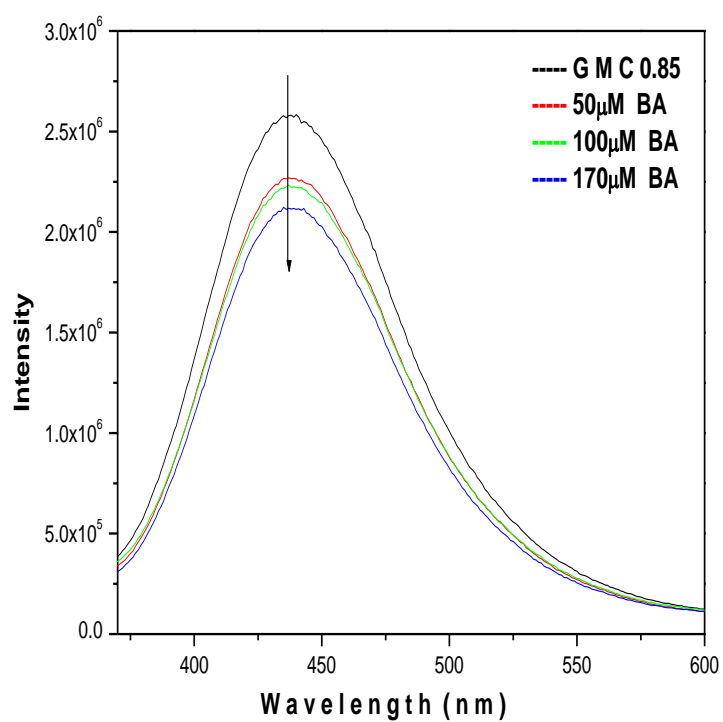

**Fig S5.** Fluorescence titration of GMC solution at pH=4 with different micro molar benzoic acid (BA) solution.

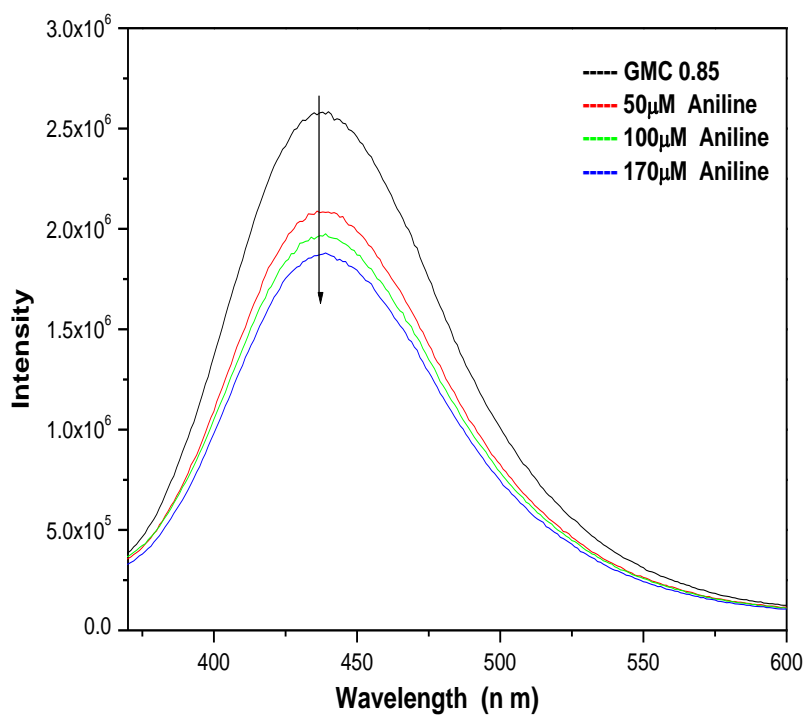

**Fig S6.** Fluorescence titration of GMC solution at pH=4  
with different micro molar aniline solution.

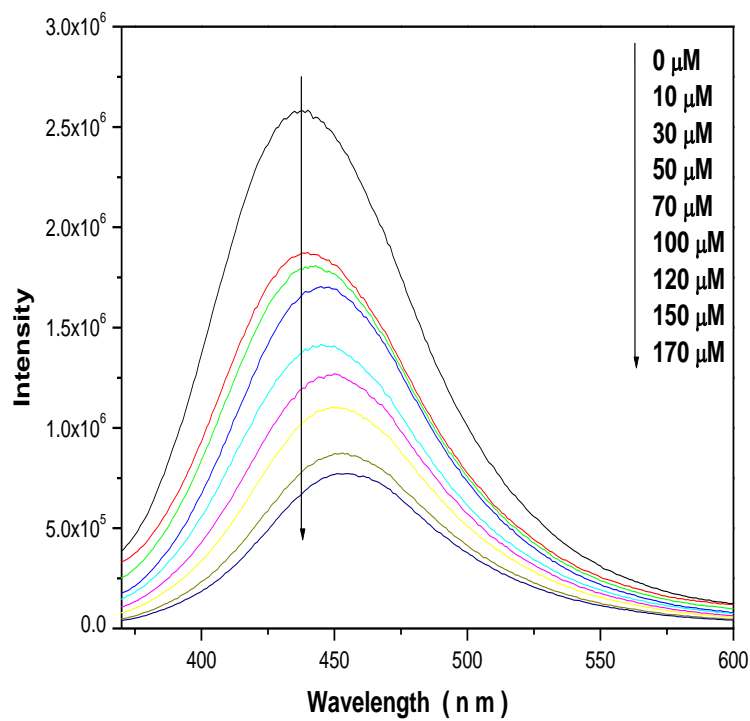

**Fig S7.** Fluorescence titration of GMC 0.85 solution at pH=4  
with different micro molar nitrophenol solution.



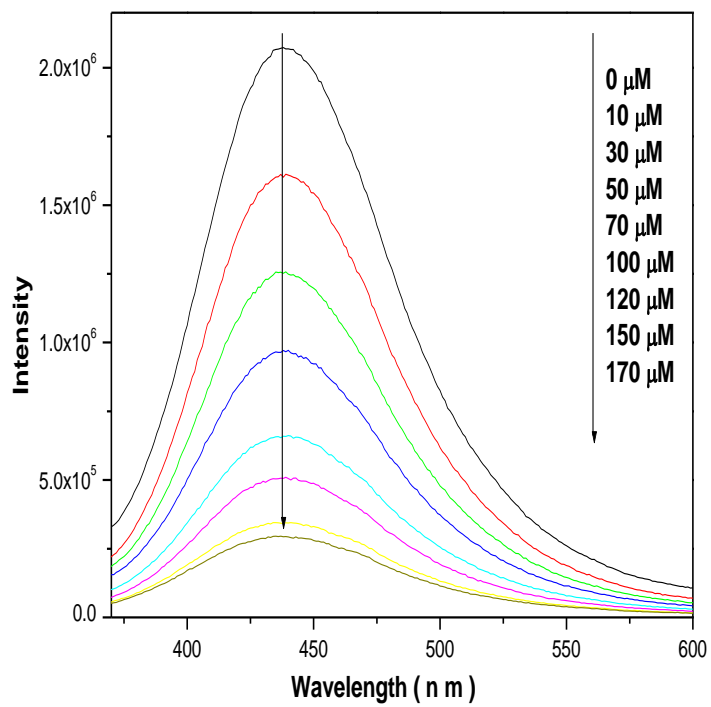

**Fig S8.** Fluorescence titration of GMC 0.85 solution at pH=4  
with different micro molar 2,4-dinitrophenol solution.

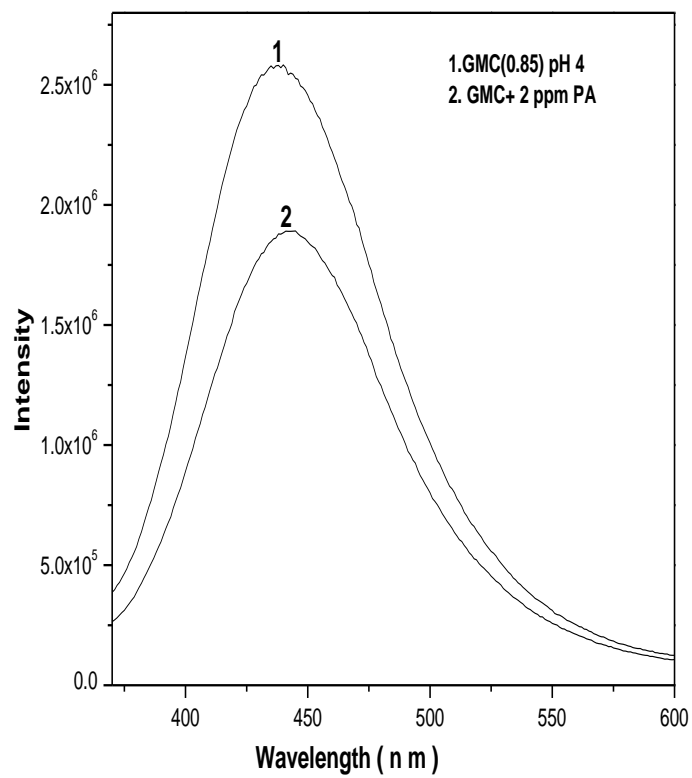

**Fig S9.** Sensing efficiency (in ppm level) of GMC sensor at pH4.

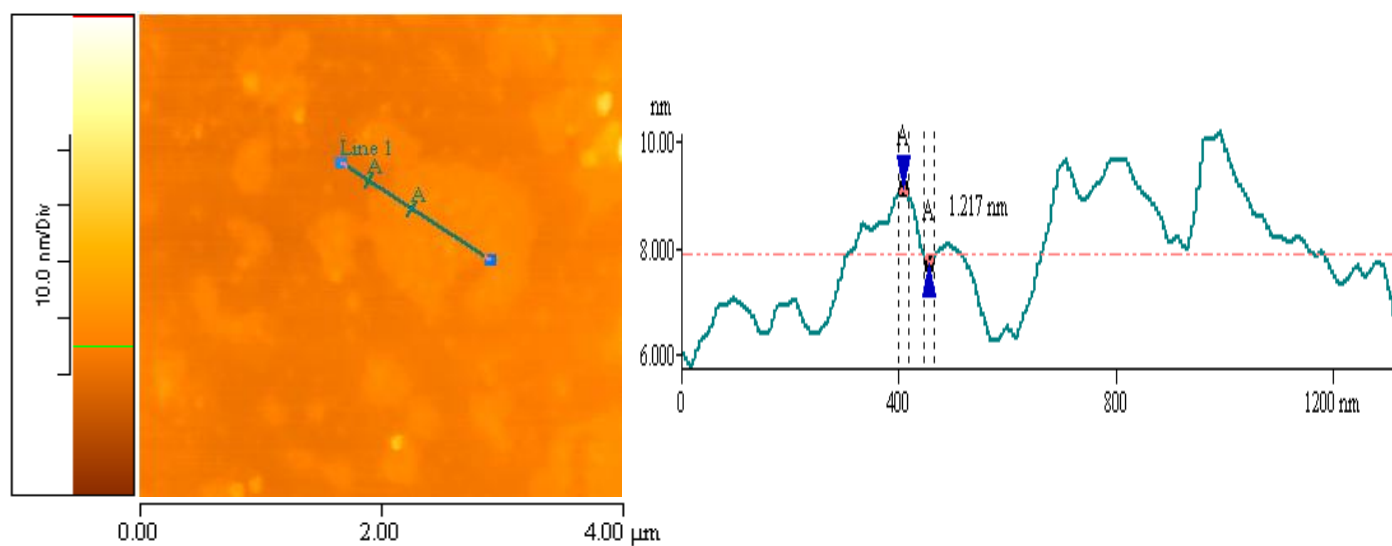

**Fig S10.** AFM image and height profile of GO.
